# Supplementary material for: How big is an OMI pixel?
Source: Copernicus journal article supplement (doi:10.5194/amt-2016-61), 2016-03-24
Supplement: Supplementary file [file amt-2016-61-AC4-supplement.pdf]

# How big is an OMI pixel?

Martin de Graaf<sup>1,3</sup>, Holger Sihler<sup>2</sup>, Lieuwe G. Tilstra<sup>3</sup>, and Piet Stammes<sup>3</sup>

<sup>1</sup>Delft University of Technology, Delft, The Netherlands

<sup>2</sup>Max-Planck-Institute für Chemie, Mainz, Germany

<sup>3</sup>Royal Netherlands Meteorological Institute, De Bilt, The Netherlands

Correspondence to: M. de Graaf, graafdem@knmi.nl

## Abstract.

The Ozone Monitoring Instrument (OMI) is a push-broom imaging spectrometer, observing solar radiation backscattered by the Earth's atmosphere and surface. The ~~shape of an OMI pixel incoming radiation is detected using a static imaging CCD detector array with no moving parts, as opposed to most of the previous satellite spectrometers, which used a moving mirror to scan the Earth in the across-track direction. The sensitivity function of the Field of View (FoV) of detector pixels, projected on the Earth, is defined as the point spread function (PSF). The OMI PSF is not quad-~~ radiation is detected using a static imaging CCD detector array with no moving parts, as opposed to most of the previous satellite spectrometers, which used a moving mirror to scan the Earth in the across-track direction. The sensitivity function of the Field of View (FoV) of detector pixels, projected on the Earth, is defined as the point spread function (PSF). The OMI PSF is not quad- ~~rangular, which is common for scanning instruments, but rather Gaussian-shaped as light from neighbouring pixels enters the Field of View (FoV)~~ super-Gaussian shaped and overlapping with the PSF of neighbouring pixels. This has consequences for pixel-area dependent applications, like e.g. cloud fraction products, and visualisation.

The shape and sizes of OMI ~~pixels-PSFs~~ PSFs were determined pre-flight by theoretical and experimental tests, but never verified after launch. In this paper the OMI ~~point spread function (PSF)~~ PSF is characterised using collocated MODerate resolution Imaging Spectroradiometer (MODIS) reflectance measurements. MODIS measurements have a much higher spatial resolution than OMI measurements and spectrally overlap at 469 nm. The ~~optimal-OMI PSF was determined-verified by finding the highest correlation between MODIS and OMI reflectances for both in cloud-free and partially clouded scenes, assuming a 2D super-Gaussian function with varying size and shape to represent the OMI PSF.~~ Our results show that the semi-official OMPIXCOR product 75FoV corner coordinates accurately fix OMPIXCOR product 75FoV corner coordinates are accurate as the Full Width at Half Maximum (FWHM) of a super-Gaussian PSF model, when this pixel shape function is assumed. The exponent of the softness of the function edges, modelled by the super-Gaussian PSF is dependent on OMI pixel row number, from about  $n = 2$  at nadir to 3.5 at the swath edges, due to the increase in pixel size. The optimal Gaussian exponent depends on scene changes between overpasses and reduces to about  $n = 1$  for exponents, is different in both directions, and view angle dependent.

The optimal overlap function between OMI and MODIS reflectances is scene dependent, and highly dependent on time differences between overpasses, especially with clouds in the scene. For

29 partially clouded scenes ~~before 2008. Then, the time difference~~, the optimal overlap function was  
30 represented by super-Gaussian exponents around 1 or smaller, which indicates that this function is  
31 unsuitable to represent the overlap sensitivity function in these cases. This was especially true for  
32 scenes before 2008, when the time differences between Aqua and Aura ~~was overpasses~~ was about  
33 15 minutes, instead of 8 minutes after 2008. ~~Between~~ During the time between overpasses, clouds  
34 change the scene reflectance, reducing the correlation and ~~changing~~ influencing the shape of the  
35 optimal overlap function.

## 36 1 Introduction

37 The Ozone Monitoring Instrument (OMI) (Levelt et al., 2006) was launched in 2004 on-board the  
38 Aura satellite, ~~with the main objective in a polar, sun-synchronous orbit at approximately 705 km~~  
39 altitude, with a local equatorial crossing-time of 13:45 (ascending node). Its main objective is to  
40 monitor trace gases in the Earth atmosphere, especially ozone. It was built as the successor to the  
41 ESA instruments GOME (Burrows et al., 1999) and SCIAMACHY (Bovensmann et al., 1999), and  
42 NASA's TOMS instruments (e.g. Fleig et al., 1986; Bhartia et al., 2013). GOME and SCIAMACHY  
43 were the first space-borne hyperspectral instruments, measuring the complete spectrum from the  
44 ultraviolet (UV) to shortwave-infrared (SWIR) wavelength range with a relatively high spectral res-  
45 olution (typically 0.2–1.5 nm), from which multiple trace gases, clouds and aerosol parameters can  
46 be retrieved simultaneously. TOMS instruments have been monitoring the ozone column at a rela-  
47 tively high spatial resolution ( $50 \times 50 \text{ km}^2$ ) with daily global coverage since 1978. OMI was designed  
48 to combine those functions and measure the complete spectrum from the UV to the visible wave-  
49 length range (up to 500 nm) with a high spatial resolution and daily global coverage. To this end, the  
50 imaging optics were completely redesigned.

51 Instead of a rotating mirror, in OMI a two-dimensional CCD detector array ( $780 \times 576$  pixels) is  
52 used to map the incoming radiation in the across-track and wavelength dimensions simultaneously. A  
53 swath of about 2600 km in the across-track direction is imaged along one dimension of the detector  
54 array. Spectrally, the radiation is split into ~~a UV~~ two UV channels and a visible (VIS) channel and  
55 imaged along the wavelength dimension of the detector array, ~~giving a~~. The spectral resolution of  
56 ~~0.63 nm for~~ the VIS channel is 0.63 nm. The along-track direction is scanned due to the movement of  
57 the satellite. In default 'Global' operation mode, five consecutive CCD images, each with a nominal  
58 exposure time of 0.4 s, are electronically co-added during a two second interval. The sub-satellite  
59 point moves about 13 km during this time interval (Levelt, 2002). The consequence of this design  
60 is that the spatial response function of the OMI footprints is not box-shaped, but has a peak at the  
61 centre of the footprint. This new design, avoiding moving parts, was used in OMI for the first time,  
62 and is now being used in several new upcoming satellite missions.

The telescope Field of View (FoV) is determined by the projection of the OMI spectrograph slit on the Earth's surface from the point of view of a CCD pixel. This projection is affected by Fraunhofer diffraction of the imaging optics ~~and is not a sharply bounded function, but consists of a central response function with extending tails,~~ which, for a circular aperture, can be modelled using an Airy function. For a rectangular slit, used in OMI, the solution can be approximated by a Gaussian function in two dimensions. The FoV has been determined pre-flight by measuring the intensity response to a star stimulus for all pixels. ~~The response function was measured by exposing the pixels to a point source and rotating the instrument. The sensitivity curve found in this way was fitted to a Gaussian curve, of which the Full Width at Half Maximum (FWHM) was reported.~~ This is proprietary information, but the results are summarised here. In the swath (across-track) direction the average peak position for each pixel was determined and fitted to a linear curve to determine the spatial sampling distance for the three channels, ~~which gives the instantaneous FoVs in the across-track direction for individual pixels.~~ For the VIS channel the FoV ~~for the entire swath~~ is 115.1°. The point spread function (PSF) in the across-track direction was not determined (or reported). However, a memo from the OMI Science Support Team from 2005 shows an across-track pixel size estimation from these measurements, where the sizes have been determined by assuming no overlap between adjacent pixels and computing the distances between the peak positions when imaged on the earth. This yields sizes in the across-track direction of 23.5 km at nadir and 126 km for far off-nadir (56 degrees) pixels.

In the along-track direction the FoV was characterised by tilting the instrument to simulate the movement in the flight direction. The measurements were fitted to a ~~normal~~-Gaussian curve with variable width for different across-track angles and wavelengths. This width is reported as the ~~Full Width at Half Maximum (FWHM)~~ FWHM in degrees, which is about 0.95 at nadir and 1.60 at 56 degrees for the VIS channel. This corresponds to a nadir pixel size in the along-track direction of about 15 km and a far off-nadir pixel size of about 42 km, when the Gaussian is convolved with a ~~boxcar function whose width is the 13 km movement of the subsatellite point during the satellite motion during 2-second exposure.~~

The instantaneous FoV (iFoV) of the OMI instrument is influenced by a polarisation scrambler, that transforms the incoming radiation from one polarisation state into a continuum of polarisation states (as opposed to unpolarised light). The incoming beam is split into four beams of equal intensity, scrambled, and projected onto the CCD. Since the projections of the four beams are slightly shifted with respect to each other, the polarisation state of the incoming radiation still slightly determines the intensity distribution of the four beams and therefore the iFoV in the flight direction. The only property which is not dependent on the polarisation state of the incoming radiation is the centre of weight of the four beams. This corresponds to the centre of the ground pixels, which is therefore the only geolocation coordinate that can be determined unambiguously (van den Oord, 2006).

Therefore, centre coordinates are provided in the Level 1b data product, but corner coordinates are not. However, for mapping purposes, ground pixel area computations (e.g. for emission estimates per unit area) and collocation, an OMI corner coordinate product was developed, called OMPIXCOR, which is provided online via the OMI data portal (Kurosu and Celarier, 2010). Two sets of quadrangular corner coordinates are provided. One set contains *tiled* pixel coordinates, which are essentially the midpoints between adjacent centre coordinates, mainly useful for visualisation purposes, as no overlap between pixels is imposed. The other set contains so-called ~~75FOV~~ 75FoV pixel coordinates, which, according to Kurosu and Celarier (2010), correspond to 75% of the energy in the along-track FoV. The authors assumed a  $1^\circ$  FWHM for the iFoV to fix a Gaussian distribution and convolved it with a boxcar to model the satellite movement. The area under a Gaussian curve corresponds to about 76% at FWHM for a normal distribution (exponent of 2), however, the authors claim to have used a super-Gaussian with exponent of 4 for this. In this case the energy contained within the FWHM has increased to about 89%. When this iFoV is convolved with the ~~satellite motion~~ boxcar function, the energy within the FWHM will have increased even more. The ~~75FOV~~ 75FoV pixels generally overlap in the along-track direction, since radiation emanating from ~~adjacent swaths~~ successive scans enter the FoV. The coordinates in the across-track direction, however, are still the half-way points between adjacent pixels.

The application of quadrangular pixel shapes for OMI can become problematic when pixel values are aggregated onto a regular grid (e.g. Level 3 products that are reported on a regular lat-lon grid). If pixels overlap, which might occur when several orbits are averaged or in case of ~~75FOV~~ 75FoV pixels, extreme values may be smoothed and reduced due to averaging. A more realistic distribution that preserves mean values can be reconstructed using a parabolic spline surface on the quadrangular grid, resulting in a much better visualisation (Kuhlmann et al., 2014). In cases where values from OMI are compared with that of another instrument, especially with a higher spatial resolution, the approximate true shape of an OMI pixel is desired. For example, we intend to combine spectral measurements from OMI and MODIS to determine the aerosol direct effect over clouds (de Graaf et al., 2012). To this end, an optimal characterisation of the PSF of the OMI footprint is desired, to optimise the accuracy of the retrieval.

In this paper, the OMI PSF for the VIS channel is investigated by testing various predefined shapes and sizes under various circumstances and determining the maximal correlation between OMI and MODIS reflectances. In section 2, the consistency between overlapping OMI and MODIS reflectances is investigated. A cloud-free scene from 2008 is used to study the PSF under the most optimal circumstances. In chapter 3, a two dimensional super-Gaussian function with a varying exponent is introduced, which can change shape from a near-quadrangular to a sharp-peaked distribution. Furthermore, the sizes in both along and across-track directions can be varied. This function is used to define various PSFs, which are investigated for various scenes. The change in PSF is further investigated by looking into the effect of scene and geometry changes during the (varying) overpass times



of OMI and MODIS. The conclusions from this study are reported in section 4. The geolocations of the pixels in the UV channels are slightly different from those in the VIS channel. However, the PSF cannot be determined in the same way for the UV, since MODIS measurements do not overlap with these channels spectrally.

## 2 Data

~~Aura~~The Aura satellite flies in formation with ~~Aqua~~the Aqua satellite in the Afternoon constellation (A-train). Aqua was launched in 2002, to lead Aura in the A-train by about 15 minutes. The time difference between the instruments within the A-train is controlled by keeping the various satellites within control-boxes, which are defined as the maximum distances to which the satellites are allowed to drift before correcting manoeuvres are executed. Therefore, the time difference between OMI and MODIS is variable by up to a few minutes. A major orbital manoeuvre in 2008 of Aqua decreased the distance between the Aura and Aqua control boxes to about 8 minutes.

To investigate the correlation between OMI and MODIS observed reflectances, several scenes were selected. One reference scene will be discussed here in detail. It was an almost cloud-free scene over the Sahara desert on 4 November 2008, around 14:00 UTC (start of the first MODIS granule). At this point in time, the time difference between OMI and MODIS was reduced to 8 minutes and around 20 – 30 seconds, depending on the pixel row. The differences between the pixel times arise from the fact that MODIS has a scanning mirror, while OMI has no scanning optics, but exposes the CCD to different scenes while moving in the flight direction. The scene is visualised in Figure 1, using MODIS channels 2, 1, and 3 to create an RGB picture at 1 km<sup>2</sup> resolution. The MODIS granules are outlined in yellow, while the considered OMI scene is outlined in red. From June 2007 onward, OMI suffered from a degradation of the observed signal in an increasing number of rows, called the row anomaly (OMI row anomaly team, 2012). In November 2008 the anomaly was limited to only rows 53 and 54 for scenes near the equator. These rows were disregarded in the comparison. In order to stay within the MODIS swath the OMI swath was further reduced to rows 2 to 57. A total of 7,335 OMI pixels are left in the scene.

To compare reflectances from OMI and MODIS, the reflectance measured by OMI is convolved with the MODIS spectral response function. MODIS channel 3 at 469 nm overlaps with the OMI VIS channel (350 – 500 nm). This is illustrated in Figure 2, where two OMI reflectance spectra from the VIS channel are plotted, together with the normalised MODIS response function of channel 3 (red curve). The reflectance spectra correspond to the darkest and brightest pixels (at 469 nm) in Figure 1, indicated by the green boxes. The darkest pixel is a vegetated area with an OMI reflectance of ~~0.0967~~ 0.0935 and the brightest pixel is a cloud covered scene with an OMI reflectance of ~~0.5075~~ 0.5040, both at 469 nm.

All the 7,335 OMI pixels in the scene in Figure 1 were compared to collocated MODIS pixels, see the left panel of Figure 3. Here, all the MODIS pixels that fall (partly) within an OMI quadrangular pixel, as defined by the OMPIXCOR 75FoV corner coordinates, are averaged with equal weight, which is the easiest and quickest averaging strategy. The MODIS reflectances are somewhat lower than the OMI reflectances; a linear fit through the points shows a slope of 0.959 and an offset of 0.0023. The MODIS reflectances show a Pearson's correlation coefficient  $r$  of 0.997-0.998 with the OMI reflectances, and a standard deviation (SD) of 0.00433. ~~The MODIS reflectances are somewhat lower than the OMI reflectances; a linear fit through the points shows a slope of 0.954 and an offset of 0.0019~~ 0.0039. The SD refers to the RMS deviation of the measurements to the model fit.

### 3 OMI point spread function

The true PSF of an OMI pixel is expected to resemble a flat-top Gaussian shape. To investigate the OMI PSF, the response at 469 nm is compared to the MODIS channel 3 signals, weighted using different super-Gaussian functions in two dimensions, and checking the change in the correlation and SD between the OMI and MODIS reflectances. A 2D super-Gaussian distribution is defined by

$$g(x, y) = \exp \left( - \left( \frac{x}{w_x} \right)^n - \left( \frac{y}{w_y} \right)^m \right), \quad (1)$$

where  $x$  and  $y$  are the along and across-track directions, and  $w_{x,y}$  are the weights in either direction, defined by

$$w_{x,y} = \frac{\text{FWHM}_{x,y}}{2(\log 2)^{1/n}} \frac{\text{FWHM}_x}{2(\log 2)^{1/n}}; \quad w_y = \frac{\text{FWHM}_y}{2(\log 2)^{1/m}}. \quad (2)$$

$\text{FWHM}_{x,y}$  are the full widths at half maximum in the along and across-track directions, respectively, defined in this paper by the ~~75FoV~~ 75FoV pixel corner coordinates. The size of the PSF model can be varied to include more or fewer MODIS pixels from neighbouring pixels in the along and across-track directions by varying  ~~$w_{x,y}$~~   $w_x$  and  $w_y$ . All size changes are reported relative to  $\text{FWHM}_{x,y}$  and  $\text{FWHM}_y$ .

The shape of the PSF model is determined by the Gaussian ~~exponent~~ exponents  $n$ , ~~which defines~~ and  $m$ , which define the 'pointedness' of the distribution. In one dimension,  $n = 2$  ~~corresponding~~ corresponds to a normal distribution,  $n < 2$  ~~resulting results~~ in a point-hat distribution and  $n > 2$  ~~resulting results~~ in a flat-top distribution, see the illustration in ~~one dimension in~~ Figure 4. Various ~~PSFs~~ PSF models are illustrated in Figure 5. The colours of the square MODIS pixels indicate the relative contribution of that pixel. The different panels show OMI pixels at different rows, to illustrate the change in orientation and number of MODIS pixels that fall inside an OMI pixel when the viewing zenith angle changes. Figure 5a shows the quadrangular OMI pixel, with all MODIS pixels within the OMI corner coordinates having equal weight, while all pixels outside the footprint have zero weight. Figure 5b shows a 2D flat-top super-Gaussian ~~( $n=8$ ) shape~~ ( $n=m=8$ ) shape

203 using the 75FoV corner coordinates to constrain the FWHM, resembling the quadrangular shape but  
 204 with smoother edges, ~~and using the 75FOV corner coordinates to fix the FWHM.~~ Figure 5c shows a  
 205 ~~normally or 2D Gaussian ( $n = 2$ ) distribution, while~~ super-Gaussian distribution, with  $n = 2, m = 4$ ,  
 206 which represents the optimal representation of the PSF using a super-Gaussian function. Figure 5d  
 207 shows a 2D point-hat ~~super Gaussian ( $n = 1$ ) distribution~~ super-Gaussian ( $n = 1, m = 1.5$ ) distribution,  
 208 which is the optimal fit of this function when broken clouds are in the scene. Figures 5e and f show  
 209 the weights for pixels which are assumed to be twice as wide or long as the ~~75FOV-75FoV~~ pixels  
 210 and using a 2D ~~normal Gaussian distribution~~ super-Gaussian distribution with  $n = 2, m = 4$ .

211 The size and shape of the ~~assumed PSF was varied in steps of 0.25~~ PSF model was varied by  
 212 ~~changing  $n$  and 0.25 FWHM for a wide range of these parameters, and for from 0.5 to 16,  $m$  from~~  
 213 ~~1 to 16, and the FWHM from 0.5 to 3 times the 75FoV corner coordinates.~~ For each configuration  
 214 the correlation between the OMI and MODIS reflectances and the SD ~~was were~~ determined, us-  
 215 ing all pixels from the scene in Figure 1. The correlation change is shown in Figure 6. The blue  
 216 ~~dashed-dotted~~ curve shows the change in correlation for a changing ~~exponent  $n$ , Gaussian exponent~~  
 217 and 1-FWHM, i.e. the change in PSF ~~shape and fixed 75FOV corner coordinates model shape~~  
 218 ~~and 75FoV corner coordinates to constrain the FWHM.~~ In the top panel the change in correlation  
 219 coefficient  $r$  is shown for a changing Gaussian exponent  $n$  using the optimal Gaussian exponent  
 220 found for the across-track direction  $m = 4$ . For this function the optimal Gaussian exponent in the  
 221 along-track direction is  $n = 2$ . The blue dotted curve shows the goodness-of-fit  $q$  corresponding to  
 222 each of the correlation coefficients  $r$  (the blue dashed-dotted line). It was determined using a constant  
 223 error for OMI measurements, and a constant error for MODIS measurements but weighted by the  
 224 number of MODIS pixels in each OMI pixel. It shows a reasonably good fit at the optimum  $n = 2$ .  
 225 ~~In this case, the highest correlation is obtained when a Gaussian distribution with exponent  $n = 2.5$~~   
 226 ~~is used, which is slightly more flat-topped than a normal distribution. The red lines show~~

227 The red line shows the change in correlation when the ~~shape of the distribution is fixed to a normal~~  
 228 ~~distribution ( $n = 2$ ). In that case, the correlation peaks for an across-track width of 0.8 FWHM,~~  
 229 ~~corresponding to a slightly more narrow pixel~~ along-track width is varied. The shown curve is for  
 230 the optimal Gaussian parameters,  $n = 2, m = 4$ , and peaks at 1.0, meaning that the 75FoV corner  
 231 coordinates are the optimal sizes to constrain the FWHM when a super-Gaussian model is used. The  
 232 lower panel shows the same dependencies in the across-track direction. ~~In the along-track direction~~  
 233 ~~the correlation peaks at 1 FWHM. If all three parameters are allowed to vary at the same time, the~~  
 234 ~~maximum correlation is found as before:  $n = 2.5$  and the pixel sizes corresponding to the 75FOV~~  
 235 ~~corner coordinates in both directions. This is shown by the purple curve, which shows the variation~~  
 236 ~~along the~~ The change of  $r$  for changing  $m$  (the shown dashed-dotted line is for the optimal Gaussian  
 237 exponent  $n = 2$ ) and the red curve is the width in the across-track direction for  $n = 2, m = 4$ . The  
 238 red curve also peaks at one, again confirming the 75FoV corner coordinates, while  $m$  peaks at  
 239 4. However, the change for larger  $m$  is minimal, meaning that the softness of the edges in the

~~across-track direction for the optimal parameters. Obviously, they make very little difference. Only the goodness-of-fit  $q$  decreases significantly for larger  $m$ , so  $m = 4$  can be used as the optimal parameter. These four optimal parameters are also the absolute maximum in the purple curve is the same as the one for the blue curve:  $r = 0.9974$  entire parameter space, with  $r = 0.998$ .~~ This is noticeably higher than the correlation when quadrangular pixels are used.

The correlation between the OMI and MODIS reflectances and the SD, when the optimal PSF model for this scene is used, is shown in the right panel of Figure 3. The SD for the optimal PSF is ~~0.004090.0036~~. The change in SD for different shapes and sizes is not shown, because it is consistent with the change of the reciprocal of the correlation, in the sense that it is minimal when the correlation peaks and can be equally used to find the optimal PSF characterisation in this way.

### 3.1 PSF sensitivity

~~So, when~~ When a super-Gaussian form is assumed, the optimal ~~OMI PSF super-Gaussian model parameters~~ for the reference scene ~~can be characterised using an exponent  $n = 2.5$  and 75FOV are  $n = 2$ ,  $m = 4$  and the 75FoV~~ corner coordinates for the Gaussian FWHM. However, the correlation between OMI and MODIS reflectances is not a constant. A number of scenes were investigated to show the change in correlation between OMI and MODIS reflectances in time and space. ~~They are treated below and illustrated in Figures 7–10.~~

First, another cloud-free scene was found over the Middle East on 7 October 2008, starting on 10:20 UTC, see Figure 7. The time difference between OMI and MODIS is about 8 minutes and 34–45 s. This scene is entirely cloud-free over land, and the reflectance ranges from 0.12 over the ocean to 0.41 over the desert. The correlation between the OMI and MODIS reflectances is depicted in the right panel of Figure 7, which displays the same dependencies as in Figure 6. The highest correlation ( $r = 0.9965$ ) using 75FOV corner coordinates is found for a Gaussian distribution with an exponent of  $n = 3$  (blue line). When the shape is fixed to a normal distribution ( $n = 2$ ),  $r = 0.9977$  was found for the highest correlation ( $r = 0.9964$ ) is found for pixel sizes that are smaller (0.8 FWHM) in the across-track direction, as for the reference scene. This is also the absolute maximum and therefore the red across-track curve coincides with the purple one same super-Gaussian parameters as before, confirming the optimal OMI PSF model. Only the goodness-of-fit was slightly lower than before, indicating a lower correlation between the OMI and MODIS reflectances.

### 3.2 Viewing angle dependence

Next, a scene over Australia was selected on 11 October 2008 starting on 04:45 UTC, see Figure 8. The time difference between OMI and MODIS is ~~also~~ about 8 minutes and 35–43 s. This scene has a large cloud-free part, but also a large cloudy part. Most cloud pixels, indicated by the red rectangles, were not used in the analysis. The correlation between OMI and MODIS for various shapes and sizes is again displayed in the right panel. The maximum correlation for this scene was

275  $r = 0.9907$ , lower than before,  $r = 0.9927$ , and obtained for a point-hat ~~Gaussian distribution with~~  
276 ~~exponent  $n = 1.75$  and super-Gaussian distribution with exponents  $n = 1.5$  and  $m = 2$ , and FWHM~~  
277 corner coordinates. ~~Note that the correlation~~ The goodness-of-fit is significantly lower than ~~for the~~  
278 ~~reference scene before.~~

279 ~~The~~ One reason for the lower Gaussian exponents of the 2008 Australian scene ~~also has the highest~~  
280 ~~correlation for an exponent smaller than 2, but the presence of clouds only partly explains this. Most~~  
281 ~~of the cloud pixels were removed, but keeping those pixels in the correlation experiment increased~~  
282 ~~the optimal Gaussian exponent, to 2.5, rather than decreasing it. The reason for this is that the in~~  
283 ~~the across-track direction is the removal of the pixels at the end of the swath, which were filtered~~  
284 ~~because of the clouds in those pixels. The~~ OMI PSF is dependent on the pixel row, ~~and the PSF is~~  
285 ~~wider or viewing angle, with wider PSFs at the swath ends. Most~~ Since most of the cloud pixels are  
286 at the swath ends, ~~and~~ removing these pixels removes the larger exponents. ~~This~~ The viewing angle  
287 dependence ~~of the PSF~~ is treated here.

288 Since the OMI FoV is dependent on the polarisation of the scene, the PSF should also be depen-  
289 dent on the scattering geometry. ~~To demonstrate this~~ Furthermore, the diffraction at the edges of  
290 ~~the FoV can be distinctly different for FoVs at nadir compared to those with a large viewing zenith~~  
291 ~~angle (VZA). To investigate this effect, the OMI PSF was determined as a function of viewing~~  
292 ~~zenith angle (VZA) characterised using a super-Gaussian function dependent on VZA.~~ For all the  
293 scenes described ~~above in this paper,~~ the optimal super-Gaussian shape was determined per OMI  
294 pixel row, by varying the Gaussian exponent and determining the maximum correlation between  
295 OMI and MODIS pixels for each pixel row. Then the optimal exponents ~~of all five scenes presented~~  
296 ~~above~~ were averaged and plotted as a function of pixel row. In this analysis, the ~~75FOV-75FoV~~ pixel  
297 sizes were used, to reduce the number of variables and because the above analysis showed that the  
298 ~~75FOV-75FoV~~ corner coordinates are good indicators of the pixel sizes for Gaussian shapes. The  
299 result is shown in Figure 9. The ~~function shows a very erratic behaviour, due to the rather large steps~~  
300 ~~in Gaussian exponents nodes that were used ( $0.25n$ ), while the change in correlation for a change~~  
301 ~~in Gaussian exponent is very small near the optimum. As a consequence, the pixel shape has only a~~  
302 ~~super-Gaussian exponents are rather wildly fluctuating, because they have a~~ limited sensitivity near  
303 the optimum, ~~and the retrieved Gaussian exponent is rather wildly fluctuating especially  $m$ .~~ Aver-  
304 aging over the scenes reduces this, but is somewhat arbitrary. In Figure 9 a boxcar average over 5  
305 neighbouring points is shown as well.

306 ~~A general trend~~ Still, some change in Gaussian exponents can be observed ~~from a flat topped~~  
307 ~~Gaussian shape towards the edge of the swath with an exponent of about 3.5 to an exponent of~~  
308 ~~around 2 at nadir. Next to the fact that the OMI FoV is polarisation dependent, the~~ as a function of  
309 VZA. The Gaussian exponent in the across-track direction  $m$  changes from around 3 – 4 at nadir to  
310 about 7 at far off-nadir. Also  $n$  is VZA dependent, changing from about 1.5 at nadir to more than 2  
311 at the swath edges. The reason for the increasing ~~exponent exponents~~ towards the swath edges is the

pixel size increase towards the swath edges. The pixel sizes are shown for reference. ~~The OMI pixel sizes increase dramatically towards the edge for the across-track direction. Wide pixels have smooth edges and a flat interior, while the small pixels around nadir also have smooth edges, but are too small to display a flat interior. The left and right edges are just ‘glued’ together. This is expressed by a Gaussian exponent of 2 or even lower.~~ FoVs at larger VZA are much wider, changing the optimal super-Gaussian that fit the PSF. Furthermore, as observed before, the diffraction at the edges of the FoV will be different at larger viewing angle.

~~This effect is in the across-track direction only, since the pixel size change in the~~

### 3.3 Scene dependencies

The smaller Gaussian exponents for the 2008 Australian scene (Figure 8) are only partly explained by the VZA dependence. The Gaussian exponent  $n < 2$  indicates a point-hat super-Gaussian distribution in the along-track direction ~~is much smaller. A Gaussian shape which is fixed in the along-track direction and variable in the across-track direction will probably give an even higher correlation, but this was not attempted,~~ which is, as Figure 5e shows, a distribution that is physically unlikely. For this scene, the super-Gaussian function is apparently not a good representation of the PSF of the OMI FoV. The reason for this mismatch are broken cloud fields in the scene, which change the scene reflectance between overpasses of Aqua and Aura. Scene dependencies will be investigated below.

### 3.4 Scene dependencies

~~Lastly,~~ The overpass time between Aqua and Aura changed in 2008, when a correcting manoeuvre brought OMI closer to MODIS. To illustrate the effect, another Sahara cloud-free scene in the beginning of 2008 was selected, ~~shown in Figure 10. At this time the correcting manoeuvre bringing OMI closer to MODIS when the manoeuvre had not yet been performed and the,~~ see Figure 10. The time difference between the instruments for this scene is as large as around 14 minutes, up to 16 minutes and 26 s. ~~The~~ In this case, the highest correlation is found for a ~~Gaussian distribution with an exponent of super-Gaussian distribution with exponents~~  $n = 1.5$  (blue line), which is,  ~~$m = 2$ , which is again~~ a point-hat super-Gaussian distribution ~~with wide wings~~. Similarly, when the shape is fixed to a ~~normal distribution ( $n = 2$ )~~ the optimal Gaussian exponents, the highest correlation is found for pixel sizes that are wider than the ~~75FOV~~ 75FoV corner coordinates, ~~which see the red curves in Figure 10. This~~ is different from the reference scene in Figure 1. The ~~most striking difference, however, is the much lower absolute value of the correlation. The~~ maximum correlation for this scene is  ~~$r = 0.980$~~   $r = 0.982$ , which is ~~2%~~ lower than for the reference scene, in December 2008. ~~Even a 4 times wider pixel size in the reference scene yields a much higher correlation between the~~ The goodness-of-fit  $q$  shows much lower values, showing the difficulty with the used PSF model to correlate the OMI and MODIS reflectances. Apparently, the time difference between the Aqua and Aura of 15 minutes makes a comparison between the two instruments much more challenging,



even for almost cloud-free scenes. It is unlikely that the OMI FoV has changed much between January and December 2008. Furthermore, a cloud-free Sahara scene in 2006 (31 January 2006, around 13:55 UTC, not shown), showed the same lower correlation, peaking for ~~a Gaussian exponent  $n=1$ , which is also a point-hat distribution with wide tails. The maximum correlation for this scene was  $r=0.971$ , which is in the same order as this scene in January 2008.~~ the same Gaussian exponents.

The effect of changing scenes between overpasses can be illustrated by looking at the pixels with the highest SD between the OMI reflectances and the average collocated MODIS reflectances. Even for a scene after 2008, when the overpass time difference is reduced to about 8 minutes, the retrieved TOA reflectance can change significantly during this time in the case of broken clouds. The pixels with the highest SD for the reference scene were marked blue in the right panel of Figure 3. The marked points correspond to the blue coloured OMI pixels in Figure 1, which are the areas where the scene contains broken cloud fields. In the few minutes between Aqua and Aura overpasses these clouds change shape and position, changing the average reflectance in a pixel when the cloud fraction is changed.

This is the main reason for the small optimal super-Gaussian exponent for the ~~2006-2008~~ Sahara scene (Figure 10) and the Australian scene (Figure 8): due to scene changes during the different overpass times, the observed overlap function deviates from the true PSF, which closely resembles a Gaussian or flat-topped Gaussian. Instead a more point-hat distribution with wider wings is found. ~~The centre of the pixel becomes more important, since this point will still have the highest correlation for both instruments. But since the signal becomes more spread out, the wider wings give coordinates~~ have the relative highest correlation, but lower than before, while the correlation becomes smoothed over a larger area, giving the tails of the function a higher correlation than for the true PSF.

### 3.4 Accuracy of combining OMI and MODIS

The optimal ~~PSF of OMI~~ overlap function for MODIS pixels within an OMI FoV can now be determined for practical purposes, i.e. mixed scenes with ocean, land and clouds. This is needed to determine the accuracy that can be expected when OMI and MODIS measurements are combined to reconstruct the reflectance spectrum for the entire shortwave spectrum. To determine the accuracy, the correlation between collocated OMI and MODIS reflectances and the SD was determined by comparing the instruments for the scene shown in Figure 11. This scene was taken on 13 June 2006, starting on 13:33 UTC when the time difference between the instruments was about 15 minutes. The scene contains a mixture of land and ocean scenes, with and without clouds, and also smoke from biomass burning on the African continent. Only OMI rows 10–50 were processed, which will often be the case to avoid problems with large pixels or extreme viewing angles. The optimal correlation was found for ~~a Gaussian exponent  $n=1$  and 75FoV~~ super-Gaussian exponents  $n=1, m=1.5$  and 75FoV corner coordinates (not shown). The low Gaussian ~~exponent can~~ exponents can again be explained from the presence of clouds that change the scene between the overpasses, and the exclu-

sion of wide pixels at the swath edges. The correlation between the OMI and MODIS reflectances using this shape is shown in the right panel of Figure 11. Obviously, the correlation is a lot lower than for cloud-free scenes ( $r = 0.963$ ,  $r = 0.964$ ). The SD is  $0.0373$ ,  $0.0371$ , which must be taken into account when OMI and MODIS reflectances are compared or combined. Furthermore, the slope of a linear fit between the OMI and MODIS reflectance is  $0.909$ ,  $0.941$ , which is smaller than that for cloud-free scenes, which showed about  $54\%$  difference. This larger range in reflectances for cloud scenes apparently off-sets the difference between the instruments even further.

### 3.5 Geometry differences

The ~~correlation~~ 4-5% difference between OMI and aggregated MODIS reflectances at 469 nm ~~shows that OMI reflectances are consistently about 5% larger than the aggregated MODIS reflectances (see (Figure 3)).~~ ~~These differences~~ can be governed by changes in viewing and solar conditions between OMI and MODIS. Since the optics and sub-satellite points differ for both instruments, the viewing angles are slightly different, even if the satellites roughly follow the same orbit. More importantly, since Aura is always behind Aqua, the solar zenith angle for OMI is always different from that of MODIS.

To investigate the effect of the differences in scattering geometry on the measured TOA reflectance, a cloud-free Rayleigh reflectance was modelled for each OMI pixel in the reference scene in Figure 1. Each pixel was simulated twice, once using the OMI scattering geometry and once using an average MODIS scattering geometry. In this way the expected reflectance difference can be determined due to the difference in overpass time, keeping all else the same. To determine the average MODIS reflectance, the simulated radiances were averaged over the OMI footprint using the optimal flat-top Gaussian distribution with  ~~$n = 2.5$~~   $n = 2, m = 4$ , as was determined for this scene (Figure 6). The average radiance was then divided by the cosine of the solar zenith angle of the MODIS pixel which is closest to the centre of the OMI pixel. In this way, the most representative solar zenith angle is used to normalise the radiances. A realistic surface albedo was taken for each pixel, in order to make the model results comparable to the observations. The surface albedo database used was the TERRA/MODIS spatially completed snow-free diffuse bihemispherical land surface albedo database (Moody et al., 2005). The monochromatic calculations were performed at 469 nm, using a standard Rayleigh atmosphere (Anderson et al., 1986) reaching to sea level, and an ozone column of 334 DU. The results are shown in Figure 12.

The reflectance ranges from about 0.085 to 0.28, depending on the surface albedo, which is smaller than the observed reflectances (cf. Figure 3, right panel). This is mainly due to the clouds in the scene which are not simulated. The simulated OMI reflectances are larger than the simulated MODIS reflectances due to different geometries, like the observations. There is a small dependence on VZA, as shown in the right panel of Figure 12, where the relative differences between the OMI and MODIS reflectances are plotted as a function of either reflectance, to highlight the change for changing VZA

(in colours). However, the difference ~~for the simulations~~ between the simulated OMI and MODIS reflectances, with a slope of 0.9965 and an offset of  $-0.001$ , is much smaller than ~~for between~~ the observations. Therefore, we conclude that geometry differences between OMI and MODIS introduce differences of less than 1% and cannot explain the observed slope between OMI and MODIS reflectances. Most likely, calibration differences are causing the difference between the observed reflectances. The simulated correlation and SD are also notably better than for the observed scene. As noted before, clouds have the largest impact on the correlation between the observed reflectances of a scene.

## 4 Conclusions

The correlation between OMI and collocated MODIS reflectances was determined, to ~~inter-compare~~ intercompare the performance of the instruments and to find the PSF of the OMI footprint. MODIS channel 3 at 469 nm overlaps with OMI's visible channel, and the signals can be compared when the reflectance signal of OMI is ~~convolved~~ multiplied with the MODIS spectral response function, and MODIS reflectances are aggregated over the OMI footprint.

Due to the design of the OMI CCD detector array and the optical path, the footprint of OMI is not quadrangular and light from ~~neighbouring pixels~~ successive scans enters the OMI FoV. The shape and size of the ~~footprint PSF of the FoV~~ was determined for a cloud-free scene, to eliminate, as much as possible, scene changes due to the different overpass times of Aura and Aqua. Assuming a super-Gaussian shape with variable ~~exponent~~ exponents and FWHM, the best characterisation of the OMI PSF ~~is was~~ found for an exponent  ~~$n=2$   $2.5$  and  $75\text{FOV}$~~   $n=2$ ,  $m=4$  and  $1\times 75\text{FoV}$  corner coordinates to ~~define constrain~~ the FWHM. ~~When the corner coordinates~~

The OMI PSF changes as a function of viewing angle. When the FWHM are fixed, the Gaussian exponent ranges from about  $2-1.5$  at nadir to ~~about  $3.5$~~  more than 2 at the swath edges, while  $m$  ranges from about  $3-7$ . This is ~~partly because the OMI PSF is dependent on polarisation, mainly due to the presence of a polarisation scrambler. Therefore, the OMI PSF changes as a function of viewing angle. However, the main reason is the~~ increase in pixel size for off-nadir angles. ~~For very wide pixels the signal flattens at the centre. This effect may become more pronounced when the super-Gaussian exponent in the across-track direction is made independent of the one in the along-track direction.~~ Furthermore, the diffraction at the FoV edges is viewing angle dependent, and the OMI PSF is dependent on polarisation, due to the presence of a polarisation scrambler in the OMI optical path.

The OMI-MODIS overlap function is scene dependent. In particular, for larger time differences between the Aqua and Aura overpasses, the optimal overlap function shape is found for smaller Gaussian exponents  ~~$n$ , still with the FWHM at the  $75\text{FOV}$  corner coordinates~~ and wider overlaps. When the scene changes between overpasses the signal is spread over a larger area, centred around

the centre coordinate. Therefore, a more optimal overlap function is found for a point-hat distribution with wider wings. This is especially true for cloud scenes, which are most frequent. The correlation decreases, and the SD increases ~~when clouds are in the scene~~, and this can be used as an indication of the expected accuracy of a comparison between OMI and MODIS reflectances. For a scene with broken clouds over both land and ocean in 2006, an optimal Gaussian exponent of  ~~$n = 1$~~   $n = 1, m = 1.5$  was found. ~~However, in~~ In general, the changes in correlation coefficient are small for small changes of the Gaussian ~~exponent around 2~~ exponents (much smaller than e.g. changes due to ~~different~~ time differences). ~~Therefore we recommend that the~~ The true OMI PSF is approximated by a ~~normal-Gaussian-super-Gaussian~~ distribution with exponent  $n = 2$  ~~and 75FOV corner coordinates, as a trade-off between the reduction of the exponent because of scene changes (clouds), and the increase of the exponent at the swath edges.~~

~~In all of the investigated cases the OMPIXCOR 75FOV corner coordinates adequately fix the size of the pixel,  $m = 4$  and 75FoV corner coordinates.~~

The use of non-scanning optics like ~~that used in~~ those of OMI will be continued in new instruments, in particular TropOMI/Sentinel-5P (Veefkind et al., 2012), to be launched in 2016. For TropOMI, a cloud masking feature is anticipated from Suomi-NPP/VIIRS (Schueler et al., 2002). Sentinel-5P will fly in ‘loose formation’ with Suomi-NPP, with expected overpass time differences of about 5 minutes. The results from this study are relevant for that mission, since such an overpass time difference will significantly change the overlap function between TropOMI and VIIRS, and affect the accuracy of a cloud mask from VIIRS. High resolution VIIRS measurements can be used in the way presented in ~~the present~~ this paper to study and characterise the TropOMI PSF and the accuracy of the cloud mask.

*Acknowledgements.* This project was funded by the Netherlands Space Office, project no.: ALW-GO/12-32. Three anonymous referees are thanked for their constructive remarks on the draft manuscript.

## 478 References

- 479 Anderson, G. P., Clough, S. A., Kneizys, F. X., Chetwynd, J. H., and Shettle, E. P.: AFGL Atmospheric con-  
480 stituent profiles, Tech. Rep. AFGL-TR-86-0110, Air Force Geophysics Laboratory, 1986.
- 481 Bhartia, P. K., McPeters, R. D., Flynn, L. E., Taylor, S., Kramarova, N. A., Frith, S., Fisher, B., and DeLand,  
482 M.: Solar Backscatter UV (SBUV) total ozone and profile algorithm, *Atmos. Meas. Tech.*, 6, 2533–2548,  
483 doi:10.5194/amt-6-2533-2013, 2013.
- 484 Bovensmann, H., Burrows, J. P., Buchwitz, M., Frerick, J., Noël, S., Rozanov, V. V., Chance, K. V., and  
485 Goede, A. P. H.: SCIAMACHY: Mission Objectives and Measurement Modes, *J. Atmos. Sci.*, 56, 127–150,  
486 doi:10.1175/1520-0469, 1999.
- 487 Burrows, J. P., Weber, M., Buchwitz, M., Rozanov, V., Ladstätter-Weissenmayer, A., Richter, A., DeBeek,  
488 R., Hoogen, R., Bramstedt, K., Eichmann, K. -U., Eisinger, M., and Perner, D.: The Global Ozone Mon-  
489 itoring Experiment (GOME): Mission Concept and First Scientific Results, *J. Atmos. Sci.*, 56, 151–175,  
490 doi:10.1175/1520-0469, 1999.
- 491 de Graaf, M., Tilstra, L. G., Wang, P., and Stammes, P.: Retrieval of the aerosol direct radiative  
492 effect over clouds from spaceborne spectrometry, *J. Geophys. Res.*, 117, doi:10.1029/2011JD017160,  
493 <http://dx.doi.org/10.1029/2011JD017160>, 2012.
- 494 Fleig, A. J., Bhartia, P. K., Wellemeyer, C. G., and Silberstein, D. S.: Seven years of total ozone from the TOMS  
495 instrument-A report on data quality, *Geophys. Res. Lett.*, 13, 1355–1358, doi:10.1029/GL013i012p01355,  
496 1986.
- 497 Kuhlmann, G., Hartl, A., Cheung, H. M., Lam, Y. F., and Wenig, M. O.: A novel gridding algo-  
498 rithm to create regional trace gas maps from satellite observations, *Atmos. Meas. Tech.*, 7, 451–467,  
499 doi:10.5194/amt-7-451-2014, 2014.
- 500 Kurosu, T. P. and Celarier, E. A.: OMPIXCOR Readme File, available at:  
501 [http://disc.sci.gsfc.nasa.gov/Aura/data-holdings/OMI/documents/v003/OMPIXCOR\\_README\\_V003.pdf](http://disc.sci.gsfc.nasa.gov/Aura/data-holdings/OMI/documents/v003/OMPIXCOR_README_V003.pdf),  
502 2010.
- 503 Levelt, P. F.: OMI Instrument, Level 0-1b processor, Calibration & Operations, in: OMI Algorithm Theoretical  
504 Basis Document. Volume I, 2002.
- 505 Levelt, P. F., van den Oord, G. H. J., Dobber, M. R., Mälkki, A., Visser, H., de Vries, J., Stammes, P., Lundell,  
506 J. O. V., and Saari, H.: The ozone monitoring instrument, *IEEE T. Geoscience and Remote Sensing*, 44,  
507 1093–1101, 2006.
- 508 Moody, E. G., King, M. D., Platnick, S., Schaaf, C. B., and Gao, F.: Spatially complete global spectral surface  
509 albedos: Value-added datasets derived from Terra MODIS land products., *IEEE Trans. Geosci. Remote Sens.*,  
510 43, 144–158, 2005.
- 511 OMI row anomaly team: Background information about the Row Anomaly in OMI,  
512 <http://projects.knmi.nl/omi/research/product/rowanomaly-background.php>, 2012.
- 513 Schueler, C. F., Clement, J. E., Ardanuy, P. E., Welsch, C., DeLuccia, F., and Swenson, H.: NPOESS VIIRS  
514 sensor design overview, in: *Proc. SPIE*, vol. 4483, pp. 11–23, doi:10.1117/12.453451, 2002.
- 515 van den Oord, G. H. J.: OMI Field of View, OMI Science Team Document RP-OMIE-KNMI-XYZ, Issue draft,  
516 January 2006, 2006.

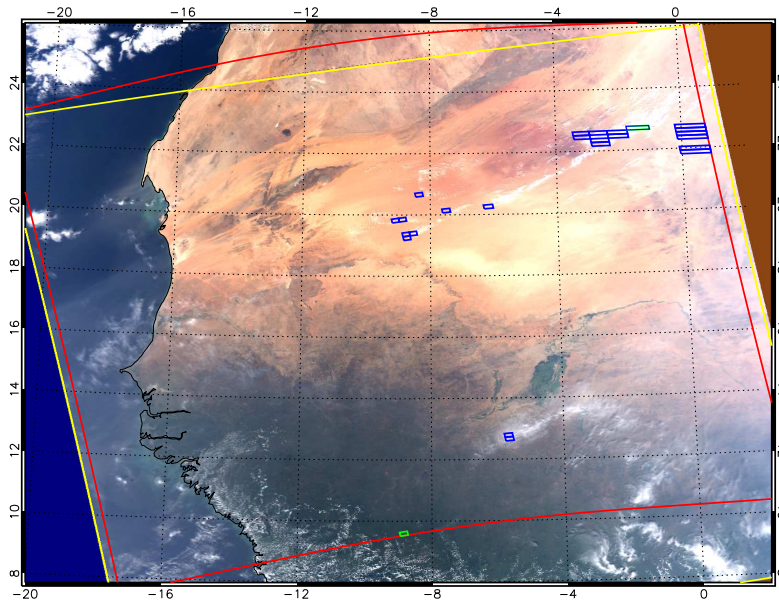

**Figure 1.** MODIS RGB image of the reference scene on 4 November 2008, 14:00 UTC (start of the central MODIS granule). The yellow lines indicate the MODIS data granules and the red lines the considered OMI swath, which was confined to rows 2–57, with the exception of pixels in the row anomaly (see text). The green pixels indicate the darkest (vegetated) and the brightest (cloud covered) areas in the scene. The OMI reflectance spectra of these pixels are shown in Figure 2. The blue OMI pixels correspond to the blue marked points in Figure 3.

517 Veeffkind, J., Aben, I., McMullan, K., Förster, H., de Vries, J., Otter, G., Claas, J., Eskes, H., de Haan, J.,  
 518 Kleipool, Q., van Weele, M., Hasekamp, O., Hoogeveen, R., Landgraf, J., Snel, R., Tol, P., Ingmann, P.,  
 519 Voors, R., Kruizinga, B., Vink, R., Visser, H., and Levelt, P.: TROPOMI on the ESA Sentinel-5 Precursor:  
 520 A GMES mission for global observations of the atmospheric composition for climate, air quality and ozone  
 521 layer applications, *Remote Sens. Environ.*, 120, 70–83, 2012.



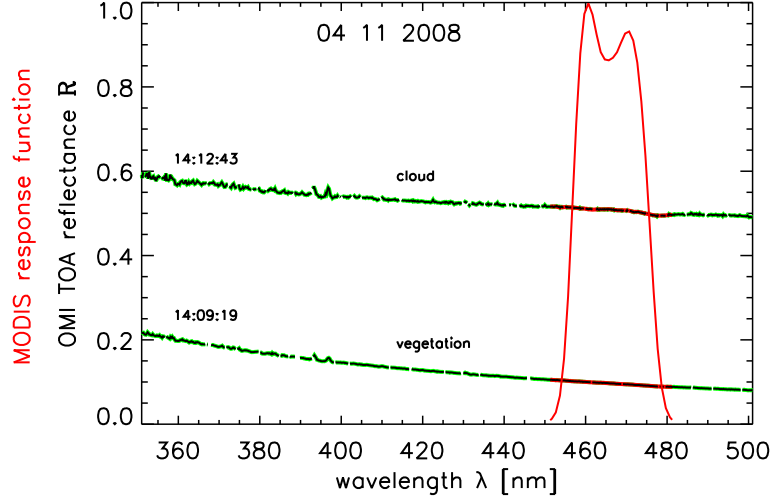

**Figure 2.** OMI top-of-atmosphere reflectance spectra on 4 November 2008, 13:37:24 UTC, and 13:38:02 UTC, of the green pixels in Figure 1 (black/green); and the normalised MODIS response function of channel 3 (red).

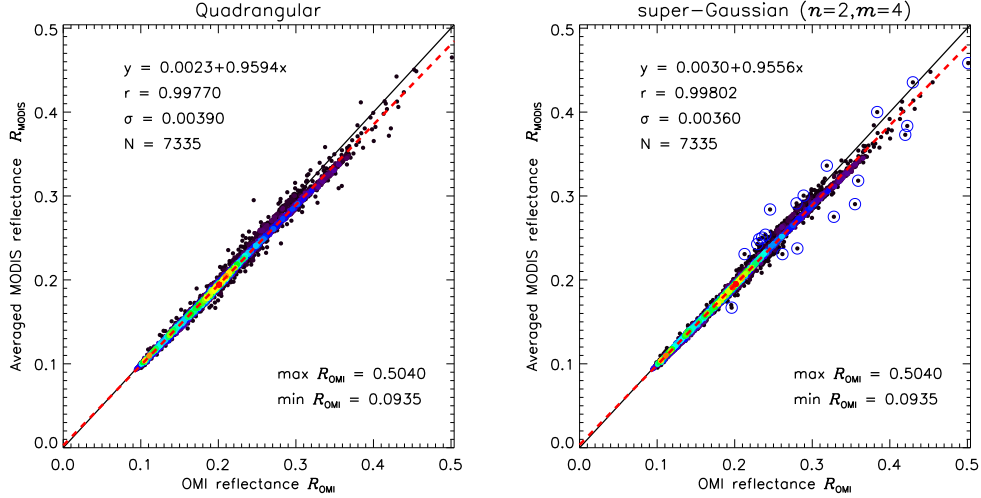

**Figure 3.** Scatter plot of OMI and MODIS collocated reflectances for the scene in Figure 1 using quadrangular OMI pixels (left panel) and optimised super-Gaussian ( $n=2, m=4$ ) pixels (right panel). The red dashed line is the linear least squares fit to the measurements, given by the linear function  $y = a_0 + a_1x$  in the plot.  $r$  is Pearson's correlation coefficient and  $\sigma$  the standard deviation of the points to the fitted line. The blue marked points have the largest  $\sigma$  and correspond to the blue OMI pixels in Figure 1.  $N$  is the number of points and  $\max R_{\text{OMI}}$  and  $\min R_{\text{OMI}}$  the maximum and minimum value in the plot, respectively.

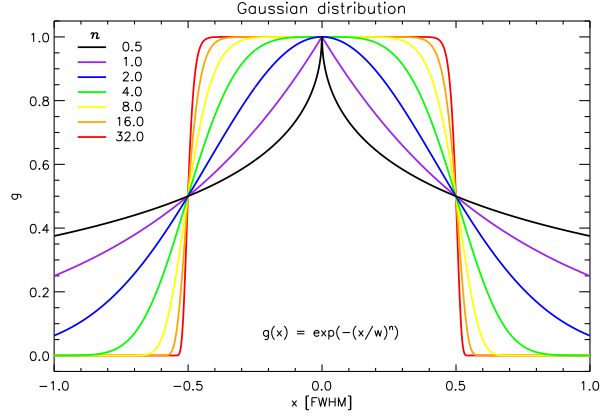

**Figure 4.** One dimensional normalised super-Gaussian distribution functions with varying exponents  $n$ . The normal distribution ( $n = 2$ ) is plotted in blue.

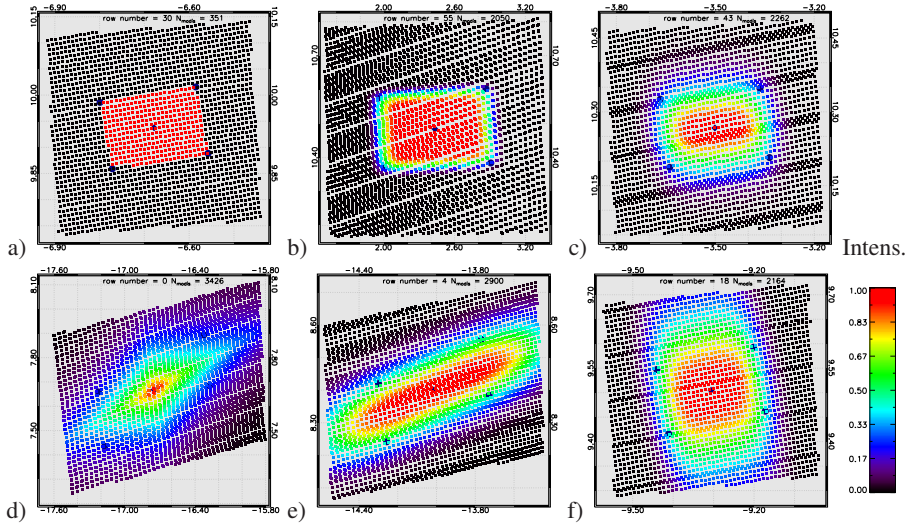

**Figure 5.** OMI 75FoV corner coordinates (dark blue filled circles), with the OMI centre coordinate (dark blue diamond), and collocated MODIS centre coordinates (black and coloured squares). The colours of the squares indicate the weighting of the MODIS pixels as indicated by the colour bar. a) Quadrangular weighting, with all MODIS pixels within the corner coordinates having equal weights, everything else disregarded; b) a 2D flat-top super-Gaussian with exponents  $n = m = 8$ , resembling the quadrangular shape with smoothed edges; c) a 2D super-Gaussian distribution with  $n = 2$  and  $m = 4$ ; d) a 2D point-hat super-Gaussian distribution with exponents  $n = 1, m = 2$ ; e) a 2D super-Gaussian distribution ( $n = 2, m = 4$ ) with twice the width in the across-track direction; f) a 2D super-Gaussian distribution ( $n = 2, m = 4$ ) with twice the width in the along-track direction. Different OMI row number are shown (see panel captions) to show the change in orientation and number of MODIS pixels for different rows.

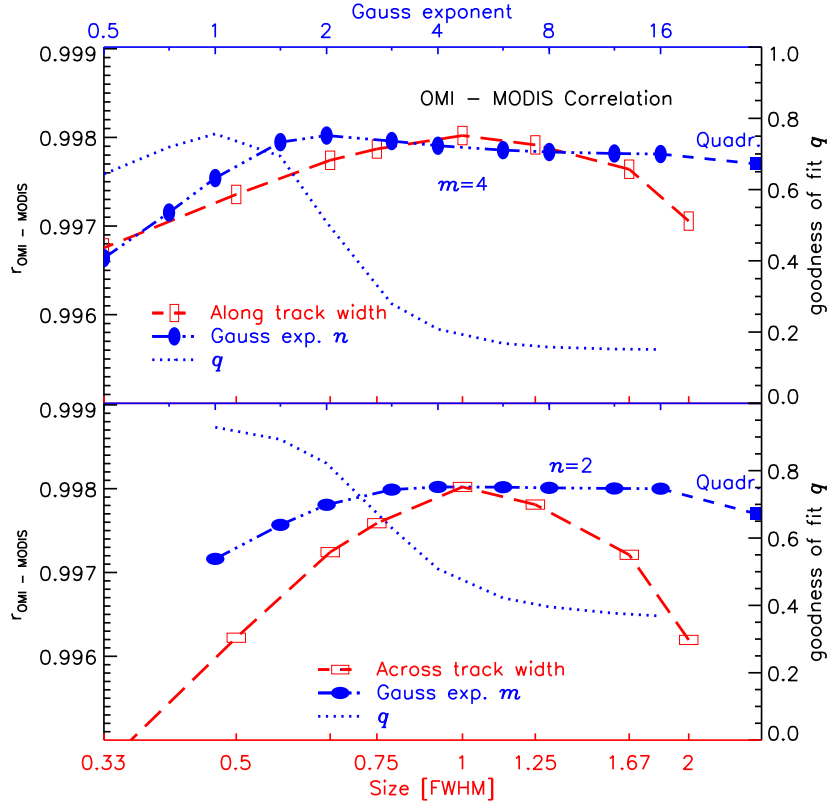

**Figure 6.** Pearson's correlation coefficient  $r$  for OMI and MODIS collocated reflectances in the scene of Figure 1 as a function of super-Gaussian shape and size of the assumed PSF. The blue line indicates the correlation as a function of exponent  $n$  (top panel) and  $m$  (lower panel), for fixed 75FoV corner coordinates. The red lines are the relationships for varying pixel sizes when the optimal Gaussian exponents  $n = 2, m = 4$  are chosen. Note that the scales are logarithmic on both x-axes.

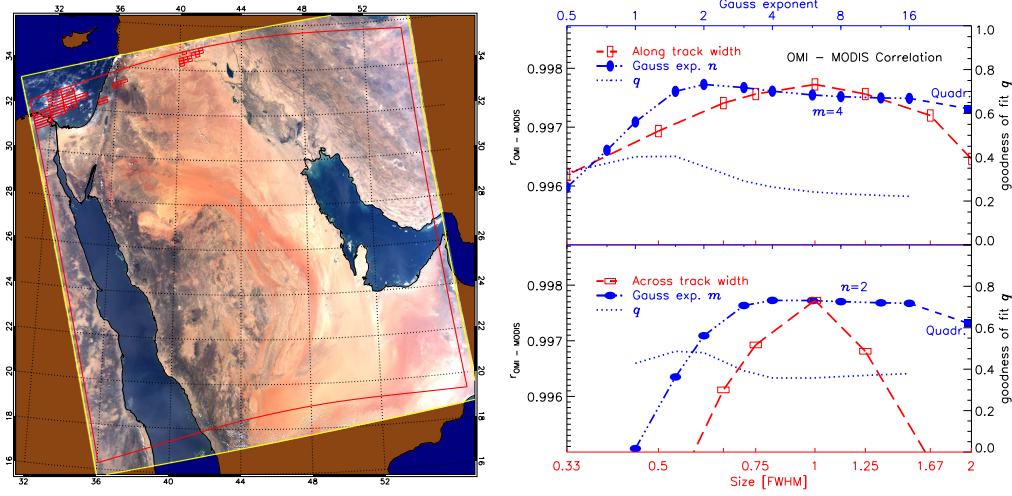

**Figure 7.** Left panel: MODIS RGB scene on 7 October 2008, 10:20 UTC over the the Middle East. Yellow and red lines as in Figure 1, while the individual red OMI pixels are cloud pixels that were manually discarded. Right panel: Dependence of Pearson's correlation coefficient  $r$  between the OMI and MODIS observed reflectance for the scene in the left panel as a function of super-Gaussian shape and size, as in Figure 6. The optimum in this case was found for Gaussian exponents  $n = 2, m = 4$  and  $1 \times 75\text{FoV}$  corner coordinates in both directions.

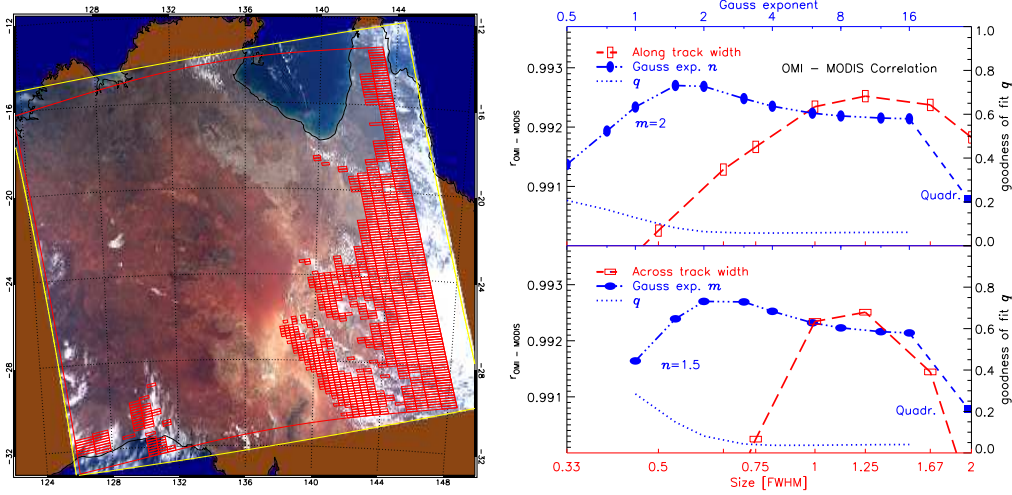

**Figure 8.** Same as Figure 7 on 11 October 2008, 04:45 UTC over Australia. The optimum in this case was found for Gaussian exponents  $n = 1.5, m = 2$  and  $1 \times 75\text{FoV}$  corner coordinates in both directions. A fit of Gaussian exponents  $n = 2, m = 4$  is best for slightly larger pixels ( $1.25 \times 75\text{FoV}$ , red line).

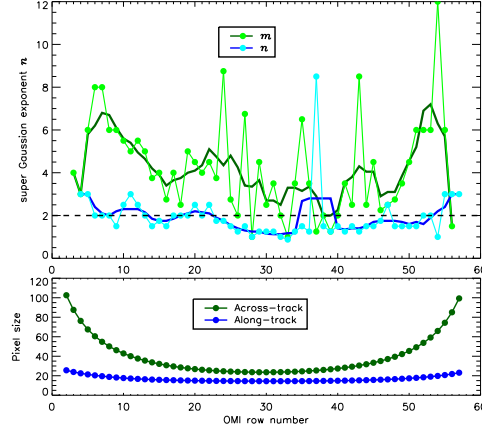

**Figure 9.** Super-Gaussian exponents  $m$  and  $n$  as a function of OMI pixel row, averaged over all scenes introduced in this paper. The FWHM was fixed to the 75FoV pixel sizes, shown in the lower panel, to determine the optimal exponent. The fat lines are boxcar averages using 5 points.

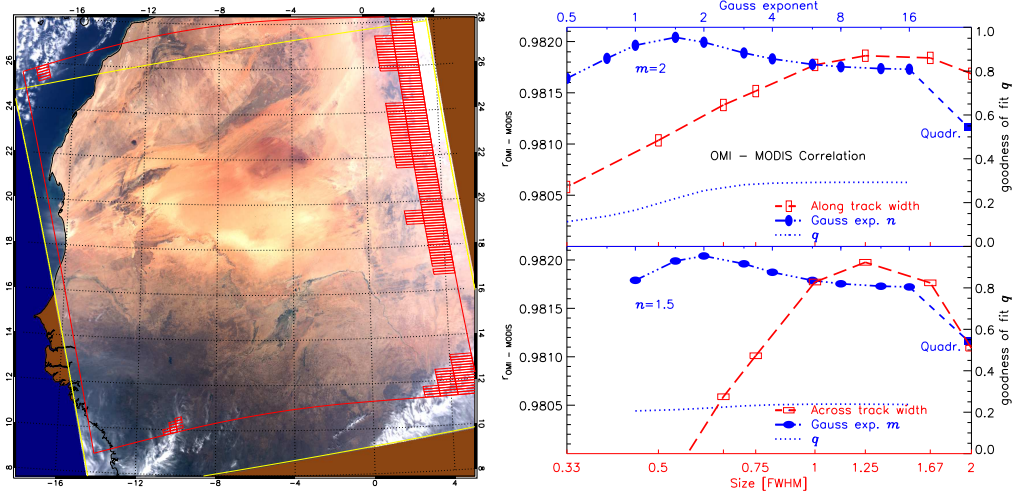

**Figure 10.** Same as Figure 7 on 7 January 2008, 13:45 UTC over the Sahara desert. The optimum in this case was found for a Gaussian exponent  $n = 1.5, m = 2$  and  $1 \times 75\text{FoV}$  corner coordinates, or  $n = 2, m = 4$  and  $1.25 \times 75\text{FoV}$  corner coordinates in both directions.

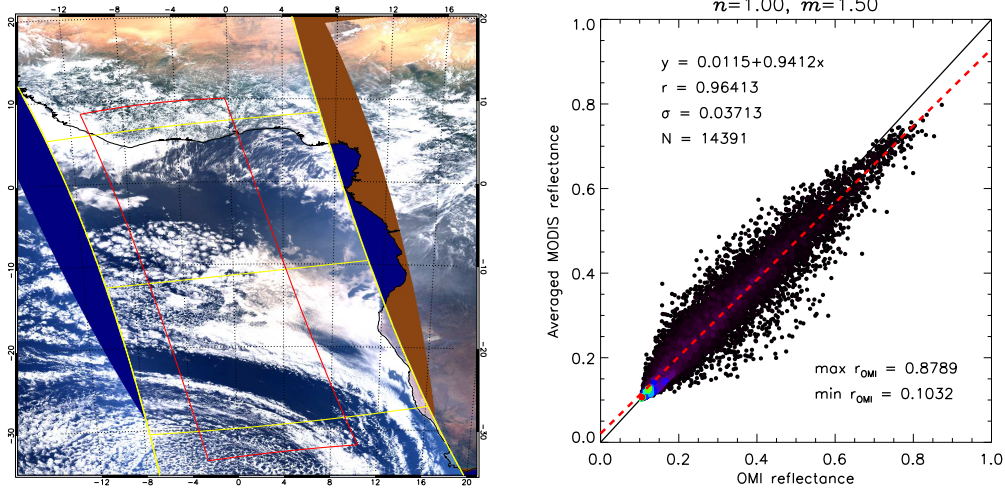

**Figure 11.** MODIS RGB image on 13 August 2006, around 13:33 UTC (lower part of the image). The yellow lines indicate the MODIS data granules and the red lines the considered OMI swath, which was from rows 10–50. The optimal correlation between OMI and MODIS for this scene was found for Gaussian exponents  $n = 1, m = 1.5$  and 75FoV corner coordinates. The correlation for this pixel shape is shown in the right panel.

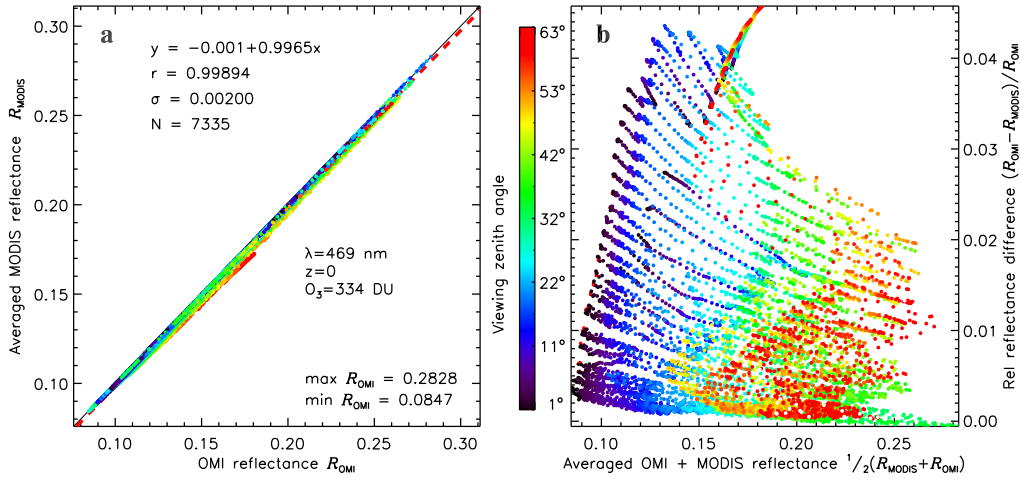

**Figure 12.** Left panel: Simulated clear-sky reflectances for the reference scene in Figure 1 using OMI scattering geometries ( $x$ -axis) and MODIS geometries ( $y$ -axis). The colours indicate the OMI viewing zenith angle of each simulated pixel. The reflectances were simulated at 469 nm, for a standard atmosphere reaching to sea level, and an ozone column of 334 DU. The surface albedo was varied according to a database (see text). The underlying red dashed line shows the linear fit to the simulations. Right panel: same data as in the left panel, but plotted as the relative difference between the OMI and MODIS reflectances.
